# Supplementary material for: Evolution of secretin family GPCR members in the metazoa
Source: PubMed Central journal article supplement (PMC1764030; doi:10.1186/1471-2148-6-108), 2006-12-13
Supplement: 1471-2148-6-108-S3.pdf [file 1471-2148-6-108-S3.pdf]

HsaCALR : -----MRFFTSRCLALFLLLN : 17  
HsaCGRPR : -----MEKKCTLYFL : 10  
S000611 : ----- : -  
S001267 : ----- : -  
S002353 : ----- : -  
CinS93 : ----- : -  
DmeCG13758 : MTLLSNILDCGCISAQRFTRLLRQSGSSGSPSAPTAGTFESKSMLEPTSSHSLATGRVPLLDHFDASTTESPGTYVLDGVARVAQAL : 90  
DmeCG32843 : -----MSDQIGNPNAT : 11  
CelC13B9.4 : -----MADATSPFNVSILDN-ST : 17  
CelC18B12.2 : ----- : -  
CbrCAE6326 : ----- : -  
CbrCAE7012 : -----MADATSPFNVSILDNSTA : 18

HsaCALR : HPTPILPAFSNQTYPIEPKPFYLVVGRKKMMDAQKYCYDRMQQLP--AYQGEOPYCNRTWDSWLCWDDTPAGVLSYQFCPPYFPDFDPS : 105  
HsaCGRPR : VLLPFFMILVTAELLESPEDSIQLGVTRNKIMTAQYECYQKIMQDPIQQAEG--VYCNRTWDSWLCWNVAAAGTESMQLCPYFPDFDPS : 98  
S000611 : -----LGITRNKIVTAQFECYQKIMKDNDRSRGRGEPMCRNPWDSWLCWDDTKAGVISEQHCPPYFPDFDPS : 67  
S001267 : -----SYCSRNDWDSWLCWDDTQAGTVASQNCPPYFFNTDPT : 36  
S002353 : -----ANHTNLNQNIQAKNQFSCLCQCNMTWDSWLCWDDTAAGTTTEQSCPPYHNFDPQ : 55  
CinS93 : -----MYNFEFTRQQNCFVNDLNI SRNSKSNFVCSFSCGAIWDGYACWPTQSSKEAVQNCPPYLPRFNTE : 68  
DmeCG13758 : EPTVMDALPDSDEQVLGNLNSAPWNLTASAAATNFENCALFVNYTLPTQGLYCNWTDLCLLWCPPTPAGV/LARMNCPGGFHGVDR : 180  
DmeCG32843 : FSGSGSGSTNVASIAESVAESGPDFDALRAACETRLNASQGLAGSGGGPAGAEAGTHCAGTFDWSWLCWDDTAVGTSAYELCPDFTIGFDPA : 101  
CelC13B9.4 : KLSEMVESGWNVLASTSVQAFNEAMDVLEESYPLCKKMLDHNLFPERDPNDTRWCNATYDVLWCPPTPANSSVTLQCPHMKGLDPNK : 107  
CelC18B12.2 : -----MTSIIIRAEEYAAQELKLENSYNNPGGCSVDFDKSLCWAFAHIGDQMDTRDCCPTFCTAIPG : 61  
CbrCAE6326 : -----MTSIIQTEYEACEKLAQ--NNSYTGSGCSVDFDRSLCWAFAHIGDQMDTRDCCPKFCTSIIPG : 60  
CbrCAE7012 : KLSEMVDGWNVLASTSVQAFNGAMDVLEESYPLCKKMLDHNLFPERDPNDTRWCNATYDVLWCPPTPANSSVTLQCPHMKGLDPNK : 108

HsaCALR : ----- : -  
HsaCGRPR : ----- : -  
S000611 : G----- : 68  
S001267 : ----- : -  
S002353 : ----- : -  
CinS93 : ----- : -  
DmeCG13758 : ----- : -  
DmeCG32843 : R----- : 102  
CelC13B9.4 : ----- : -  
CelC18B12.2 : ----- : -  
CbrCAE6326 : ----- : -  
CbrCAE7012 : NIVKRCDEMGRWAGKPKPGWNTNFVCFKIDYEDVKFSSCVRLIRCNVFCVTPHKVPYSNHTRHQTHFLIRAILDLYLSNQP : 198

**TM1**

HsaCALR : -----EKVKYCKDEKGVWFKHPENNR-----TWISNYTMCN-----AFTPEKLNAYVLYVLAIVGHSLSIPTLVIS : 166  
HsaCGRPR : -----EKVTIKCDDQGNWFRHPASNR-----TWITNYTRCC-----VNTHEKVKALNLFVLTIIIGHGLSLIASLLIS : 159  
S000611 : -----EMVTIKVCTDGGYWFQHPESNR-----TWITNYTRCC-----EHTHEGR-TAMNLFV/LALIGHGLSLTSLFIS : 128  
S001267 : -----EKATKYCGEDGQWFRHPDTRN-----TWISNYTLCN-----ENTKAKLSAYILFYMAIVGHASIASLLIS : 97  
S002353 : -----AVASKVCTENGEGWRHPESNR-----TWITNYENCI-----ANSTNHQTAAMHFVLYVIGHTLSLVSLIS : 116  
CinS93 : -----EFAVRPCQANGWFRYPTTQY-----QWITNYSRQCLQ-----KGQEAUVAKYRLAISGYSVSMITLLVA : 127  
DmeCG13758 : -----KFAIRKCELDGRWSSRPNATEVNP--QWTDYCPCKPEIIRLMQMGSKDFDAYIDIARRTRLEIVGLCLSLFALIVS : 258  
DmeCG32843 : -----YAHKECGLDGEWFKHPLTNK-----TWISNYTTCVN-----LEDLNWRHTVNLISEVGYGTSLLAAILIS : 160  
CelC13B9.4 : -----NITKDCHVSGVWSSGRNAGEMGPTLPQWTFNFTMCYTDDEVYIMQNLNNEESLITAEQVARNARKLEFVGLGLSLVSLILA : 185  
CelC18B12.2 : -----CEEIKDRYMVSRNCNSMGVWQ--DSNYTMCIKVVEEYAAQCLG-----FCRVCPDVLRLDVI SVSLTSLFVSVILLVAA : 133  
CbrCAE6326 : -----CEDIKKYMVSRNCNSMGVWQ--DTNYTMCIKVVEEYAAQCLG-----FCRVCPDVLRLDVI SVSLTSLFVSVILLVAA : 132  
CbrCAE7012 : TSTKLYTSTENITKDCHVSGVWSSGRNAAEMGPTLPQWTFNFTMCYTDDEVYIMQNLNNEESLITAEQVARNARKLEFVGLGLSLVSLILA : 288

**TM2** **TM3**

HsaCALR : LGIFVFFRKLTTIFPLNWKYRKALSLGCQRVTLHKNMFLTYILNSMII IHLVEVVPNGE-----LVRRDPVSCKELHFFHQYM : 245  
HsaCGRPR : LGIFFFYFKS-----LSCQRITLHKNLFFSFCVNSVVTIIHLTAVANNQA-----LVATNPVSCKVSQFIHLYL : 222  
S000611 : LGIFFFHN-----CQRITLHKNLFFSFCVNSVVTII IWLTAVANNQA-----MVQRNPTSCKVSQFIHLYL : 188  
S001267 : LAISSTSGDKSDLG-----WIFLSCQRITLHKNLFFSFCVNSVVTII IYLVAVVANNPE-----VVSNR-VGCKLHFFHYM : 167  
S002353 : LTIFFYFKS-----LSCQRITLHKNLFFSFCVNSVVTII IWLTVVANNQA-----HHTHYSAICK-LLMFHLYL : 178  
CinS93 : LFIFFFHRS-----LQCRVITMHHKLFVSVYLNALASVWLVHSHTIPGVS-----QVYCKFLHAIHQYT : 186  
DmeCG13758 : LLIFPCTFRS-----LRNNRTKIHKNLFFVAMVLOVIRLTLVLDQFRRGNKEAATN-TLSVSIENPTYLCEASYVLLLEYA : 331  
DmeCG32843 : LAALGYFKS-----LKCARTLHMLNLFASFAANNSLWLVWVLLVMPNSE-----LLHQSMPRCAALHITLHFY : 223  
CelC13B9.4 : ISIFSIFRR-----LRVFRNLHLHLMIAMLMVYIRLVLYIDLIFGTGENGPHNTSAEGKTIINTMPIVCEBMFFLEFY : 259  
CelC18B12.2 : IVLFSIFDS-----IQCRRLSIHKNLATAFVFRFAVLAITWIVQSTNLFQDCTR--LTPLPLWDEWICKAILWFVVIYF : 205  
CbrCAE6326 : IILFSVFDL-----IQCRRLSIHKNLATAFVFRFAVLAITWIVQSTNLFQDCTR--FHPLPIDWLEWICKAILWFVVIYF : 204  
CbrCAE7012 : ISIFSIFRR-----LRVFRNLHLHLMIAMLMVYIRLVLYIDLIFGTGDI GPHNTSAEGKTIINTMPIVCEBMFFLEFY : 362

**TM4** **TM5**

HsaCALR : MACNYFWMLCEGIYLT-LIVVAVFTEKQRLRWYVYLLGWGFPVLPVTTIHAITRAVYFNDCNWSVETHLL-----YIIHGPVMAALVVNL : 329  
HsaCGRPR : MGCNYFWMLCEGIYLT-LIVVAVFAEKQHLWYVYLLGWGFPVLPVTTIHAITARSLYFNDCNWISSDTHLL-----YIIHGPVMAALVVNL : 306  
S000611 : FGCNYFWMLCEGIYLT-LIVVAVFAEKQHLTWYVYLLGWGFPVLPVTTIHAITARSLYFNDCNWISSDTHLL-----YIIHGPVMAALVVNL : 269  
S001267 : LGCNYFWMLCEGIYLT-LIVVAVFAEQHLLWYVYLLGWGFPVLPVTTIHAITARSLYFNDCNWISSDTHLL-----YAVHGPIVAALLVNL : 251  
S002353 : LSCNYFWMLCEGIYLT-LIVVAVFAEKQHLWYVYLLGWGFPVLPVTTIHAITARSLYFNDCNWISSDTHLL-----YIIHGPVMAALVVNL : 262  
CinS93 : ETSNYFWMLCEGIYLT-LVVVSVFREKQNLIIYVYLLGWGFPVLPVTTIHAITARSLYFNDCNWISSDTHLL-----YIIHGPVMAALVVNL : 270  
DmeCG13758 : RTAMFMWMLIEGLYLT-LVVAVFQGSFPLKFFSRLGWCVPILMTTVYVARTVMYMDTSLGECLEWNYNLTP-YYNILEGPRLAVILLNL : 419  
DmeCG32843 : LLSNYSWMLCEGIYLT-LVVAVFISEKRLKWLIAFGWGSFAIVFYVSMARGLGCTPEDNRHCWNNQNTNYQ--NILMVPCISMFNLN : 310  
CelC13B9.4 : KTVTFWMLFLEGIYLT-LIVVAVFSEKRLKWLIAFGWGSFAIVFYVSMARGLGCTPEDNRHCWNNQNTNYQ-EPNILEGPRLAVILLNL : 347  
CelC18B12.2 : NVASVMMMLIEGAFVLSRFTVFAAMRHSADPNLSYLACGWGFPVFPVVTAWALVHQYIISQQTNSFCWLPYAQGLHLNLAGTMSALIMNL : 295  
CbrCAE6326 : QVASVMMMLIEGAFVLSRFTVFAAMRHSADPNLSYLACGWGFPVFPVVTAWALVHQYIISQQTNSFCWLPYAQGLHLNLAGTMSALIMNL : 294  
CbrCAE7012 : KTVTFWMLFLEGIYLT-LIVVAVFSEKRLKWLIAFGWGSFAIVFYVSMARGLGCTPEDNRHCWNNQNTNYQ-EPNILEGPRLAVILLNL : 449

**TM6** **TM7**

HsaCALR : FFLNINVRVLTCKMRETHEAE----SHMYLKAVKATMILVPLLLGIQFVVPFWR----PSNKMLGKIYDYVMHSLIHFGQFFVATIYCF : 410  
HsaCGRPR : FFLNINVRVLTCKLVTHQAE----SNLYMKAVRATLILVPLLLGIQFVVPFWR----PEGKIAEEVYDIIMHILMHFGQLLVSTIFCF : 387  
S000611 : FFLNINVRVLTCKLVTHKAE----SSLYMKAVRATLILVPLLLGIQFVVPFWR----PDGQVSEIYDIIMHIFMHFGQLLVSTIFCF : 350  
S001267 : FFLNINVRVLTCKLRDTHRAE----SNMYMKAVRATLILVPLLLGIQFVVPFWR----PENRIAGEVYDIIMHILMHFGQLLVSTIFCF : 332  
S002353 : FFLNINVRVLTCKLRVTHQAE----SSLYMKAVRATLILVPLLLGIQFVVPFWR----PDDPRVFESYDIIMEILMHYQGLLVSTIFCF : 343  
CinS93 : IILMNLRLVLSKLR-ANRNN-----IQRYLGAIKATLVLIPLLGSQHLLIITLALY-IPN-ASVLRVLSYITNLVLSFGQFAVAIIFCF : 352  
DmeCG13758 : CFLVNIIRVLLKLRQSQASD-----IEQTRKAVRAATLILVPLLLGIQFVVPFWR----KATATNFAVWYSGHTFLTSPQGFIALYLCF : 501  
DmeCG32843 : LFLCNIRVLLKLNAPASIQSGCSPRTVLQAFRATLILVPLLLGIQFVVPFWR----PKHPWENTYDIISAFATASFGQGLVAVLFCF : 397  
CelC13B9.4 : FFLCNIRVLLSKVRESNNTS----EAGLKKSVKAAMMLLPLLLGVPNMQITPFAPTRDNIMVFAVWYFASFTYMSQGLMVASLYCF : 432  
CelC18B12.2 : IFLMIVVILVQKLRTEASAE----SKKIWRITIKATLILVPLLLGVSNIPLFYE----PEHP--SSVYMLGSAILOHSGQIFIAVLYCF : 374  
CbrCAE6326 : IFLMIVVILVQKLRTEASAE----SKKIWRITIKATLILVPLLLGVSNIPLFYE----PEHP--SSVYMLGSAILOHSGQIFIAVLYCF : 373  
CbrCAE7012 : LFLCNIRVLLSKVRESNNTS----EAGLKKSVKAAMMLLPLLLGVPNMQITPFAPTRDNIMVFAVWYFASFTYMSQGLMVASLYCF : 534

HsaCALR : NNEVQTTVKRQWAQFKIQWN-----QRWGRRPSNRSARAAAAAAEAGDIPIYICHQEPNNEPANNQGEESAEIIPLNIEQESSA- : 490  
 HsaCGRPR : NGEVQAILRRNWNQYKIQFG-----NSFS-NSEALRSASYTVSTISDGP-GYSHDCPSEHLNGKSIHDIENVLLKPENLYN----- : 461  
 S000611 : N--GEAVLRRHWNQHNIQFG-----SSVGNHSDAMRSASYPASSITEVQGCYSIDGHSEHMNGKGFHDTDTSMMLKSDSFFA----- : 424  
 S001267 : NGEV----- : 336  
 S002353 : NGEVQSVLRRHWNQORMQFT-----GTFA-SADFFRSASYVASSLTVHRCYSTESHAEHLNG---GKSYSDIFRSESFFV----- : 415  
 CinS93 : HEEVLIPLLG-----SQHILLTIALYIPNASVLRVLSYITNVLSSFQGFVAIIFCFCHEEVGRIT----- : 413  
 DmeCG13758 : NGEVRHQVTQLSICLKPSLFPKTIYIFAVLLKSLATQLSVRGHPEWAPKRASMYSGAYNTAPDPTDAVQPAQDP SATGKRISPPN----- : 585  
 DmeCG32843 : NGEVIAQMKRKRMMCFNSR-----PRTNSYTATQVSVFVRCGPPLPGEEKV----- : 443  
 CelC13B9.4 : NKEVNHVLKTFYARYRLLHKSQNELRRGSRVASHYAAKNGTANASAPQTNNAEFGKLSPFPSRSKKGSDDDSTTKLMKDAVMEEKKNAN : 522  
 CelC18B12.2 : NSEIQGALKRQLSKVPFEFFFKTRNRFETERTYVPEARNATKNGVPMEE MNKTKNIESGENTESQDQVSTGKQIYSVSTKS----- : 454  
 CbrCAE6326 : NSEIQGALKRQLSKVPFEFFFKSRNRFETERTYVPEARNATKNGVPMEE LNGTKKIESENIESQEANS SDKQIYSVPTKS----- : 453  
 CbrCAE7012 : NKEVNHVLKAFYARYRLLHKSQNELRRGSRVASHYAAKNGTNTNAQQANNADENGLSPFPSRSKKGSDDDSTTKLMKDTVMEEKKNAN : 624

HsaCALR : ----- : -  
 HsaCGRPR : ----- : -  
 S000611 : ----- : -  
 S001267 : ----- : -  
 S002353 : ----- : -  
 CinS93 : ----- : -  
 DmeCG13758 : ----- : -  
 DmeCG32843 : ----- : -  
 CelC13B9.4 : NNGYGSAGEMTPLREGSNRSTKSP- : 546  
 CelC18B12.2 : ----- : -  
 CbrCAE6326 : ----- : -  
 CbrCAE7012 : NNGYGSAGEMTPLREGYEE----- : 643
