# Supplementary material for: Evolution of secretin family GPCR members in the metazoa
Source: PubMed Central journal article supplement (PMC1764030; doi:10.1186/1471-2148-6-108), 2006-12-13
Supplement: 1471-2148-6-108-S5.pdf [file 1471-2148-6-108-S5.pdf]

HsaPTR1 : -----MGTARIAPGLALLLCCPVLSSAYALVDADDVMTKEEQIFLLHRAQAQCEKRLKEVLQRPASIMESDKGWTSASTS : 75  
HsaPTR2 : -----MAGLGASLHVWGWMLGSCLLARAQLDSDGITITIEEQIVLVKAKVQCELNITAQLQ-EGEGN----- : 62  
TruPTR1 : -----MPLHHLDFLLISLFSSTWCLVCADDVLTKEEQIGLLFRAKRTCEGNIKAKHKVPDGFCS----- : 58  
TruPTR2 : MKLIPARKMFQPGEGKSMKPDMMVIMVINFVHWTLADTQIEVDGPLSAQEQMIILYDIKLCQQQLSNTDPGFTDEP----- : 78  
TruPTR3 : -----MSAWTTASLFLSQCVILVLSALIDADDVITRDEQIYVILGAHAKCERKIKAQIALVK----- : 56  
CinS372 : -----MADDGITTLQEVMEVVLLEAQRNCKRDLEAGLPPKDK----- : 37  
CinS752 : -----MKNLIDDDVNNEVSKTGRMETMADDGITTVREMMEVLMEAQG-NCKRDLEAGLPPMDK----- : 56

HsaPTR1 : GKPRKDKASGKLYPESEEDKEAPTGSRYRGRPCLEPWHILCWP LGAPGEVVAVPCPYIYDFNHHK--HAYRRCDRNGSWELVPGHNRIT : 163  
HsaPTR2 : -----CFPEWDELICWPRGTVGTSAVPCPYIYDFNHHK--VAFRHCNPNGTWDFMHSLNKTI : 118  
TruPTR1 : -----PEWGGIVCWPEGPGKLVSTACEPIYIYDFDHHK--LAYRRCDFNGTWEQASAN-RT : 111  
TruPTR2 : -----CPPEWGLICWPRGSGGLVTRVPCPSYIYDFNHHK--HAYRRCDFNGTWEQASAN-RT : 134  
TruPTR3 : -----AGDCIPEWGGIICWPRGSGGLVTRVPCPSYIYDFNHHK--WAYRRCDFNGTWEQASAN-RT : 115  
CinS372 : -----DGEWDKITCWPNSAPGRTVRLPCPEYIYDFDHHK--HALRHCSRDRGRWAMVRDTNRT : 92  
CinS752 : -----DGEWDKITCWPNSAPGRTVRLPCPEYIYDFDHHK--HALRHCSRDRGRWAMVRDTNRT : 113

TM1

TM2

HsaPTR1 : WANYSECVKFLTNETR--EREVFDRLGMIYTVGVSVSLASLTVAVLILAYFRLRHCTRN IHHMLFLSFMFLRAVSIFVKDAVLYSGATLD : 251  
HsaPTR2 : WANYSDCLRFLOPDISIGKQFFERLYMYTVGVYSISFGSLAVAILIIGYFRLRHCTRN IHHMLFVSFMFLRATSIFVKDRVVAHIGVK : 208  
TruPTR1 : WANYNECAQFLYHYNHSHEKEVFFHRLYLYTVGVYSISLGLSILVAVLILGYFRLRHCTRN IHHMLFVSYMLRALSIFVKDVLVYSGSTLE : 201  
TruPTR2 : WTNVSECWFHLHNNYEEERQHFFDRLYVIYTVGVAVSFSMLVAILIMGFRLRHCTRN IHHMLFLSFMFLRAVSIFVKDRVVAHIGVK : 224  
TruPTR3 : WANYTECTTYLNSNYKS--QEVVFKRLHLMYTVGVSVSLASLTVAVLILAYFRLRHCTRN IHHMLFVSFMFLRATSIFVKDRVVAHIGVK : 204  
CinS372 : FSDYSGSCN----IPREEDVVMIRRGGLYTVGVSVSLVALVAFMILAYFRLRHCTRN IHHMLFVSFMFLRATSIFVKDRVVAHIGVK : 178  
CinS752 : FSDYSGSCN----IPREEDVVMIRRGGLYTVGVSVSLVALVAFMILAYFRLRHCTRN IHHMLFVSFMFLRATSIFVKDRVVAHIGVK : 199

TM3

TM4

HsaPTR1 : EAERLTHEELRAIAQ--APPPATAAAGYAGCRVAVTFFLYFLATNYYWILVEGLYLHSLIFMAFFSEKKYLWGFVTFGWGLPAVFVAVV : 339  
HsaPTR2 : ELESIMQDDPQNSIATSVD---KSQYIGCKIAVVMFYFLATNYYWILVEGLYLHNLIFVAFFSDTKYLWGFILIGWGFPAAFVAAW : 294  
TruPTR1 : NMERVTVELKSITE--APP---ANKTQF IGCKVVVTLFMYFLATNYYWILVEGLYLHSLIFMFTFSDRKYLWGFLLIGWGVPAVFVAVV : 286  
TruPTR2 : DFDSALLDN--TKSISMSPD---KSRYVGCKVTVVLFYFLATNYYWILVEGLYLHSLIFMAFRTANKYLWGFILIGWGVPAVFVAVV : 308  
TruPTR3 : SASDSTAMTS-----HMAGCKVAVTFFLYFLATNYYWILVEGLYLHSLIFMAFSDKNYLWALIIIGWGVPAVFVAVV : 277  
CinS372 : DINTPDGEMTLEALKNRVDEIDADRSSYLIGCKVMTLHFYFVATNYYWILVEALYLHSLIFVAFFSDKYLWRFVSVTGWGVPIFVVPW : 268  
CinS752 : DINTPDGEMTLEALKNRVDEIDADRSSYLIGCKVMTLHFYFVATNYYWILVEALYLHSLIFVAFFSDKYLWRFVSVTGWGVPIFVVPW : 289

TM5

TM6

HsaPTR1 : VSVRATLANTGCWDLSSGNKKWIIQVPIIASIVLNFILFINIVRVLATKLRN-AGRCDRQYRKLAKSTLVLMPLFGVHYIVFMATP : 428  
HsaPTR2 : AVARATLADARCWELASAGDIKWIYQAPILAAIAGLNFILFINIVRVLATKLRN-AGRCDRQYRKLAKSTLVLMPLFGVHYIVFMATP : 383  
TruPTR1 : ATVRAVFADETCWDLASAGNLKWIYQVPIIASIVLNFILFINIVRVLATKLRN-AGRCDRQYRKLAKSTLVLMPLFGVHYIVFMATP : 375  
TruPTR2 : AIVRAALADARCWELASAGNLKWIYQVPIIASIVLNFILFINIVRVLATKLRN-AGRCDRQYRKLAKSTLVLMPLFGVHYIVFMATP : 397  
TruPTR3 : VSARASLADTHCWDIASAGNLKWIYQVPIIASIVLNFILFINIVRVLATKLRN-AGRCDRQYRKLAKSTLVLMPLFGVHYIVFMATP : 366  
CinS372 : AIVRAKLDATACWDIAVTEYKWIYNGPIVANVINFLFLFINIVRVLATKLRN-AGRCDRQYRKLAKSTLVLMPLFGVHYIVFMATP : 358  
CinS752 : AIVRAKLEDTCWDLIAVTEYKWIYNGPIVANVINFLFLFINIVRVLATKLRN-AGRCDRQYRKLAKSTLVLMPLFGVHYIVFMATP : 379

TM7

HsaPTR1 : YTEVSGTLWQVQMHYEMLFNSFQGFVVAIYCFNGEVQAEIKKWSRWLALDFKRRKARSGSSYS---YGPVMSHTSVINVGPRVGL : 514  
HsaPTR2 : HSFTG-LGWEIFMHCLEFFNSFQGFVVAIYCFNGEVQAEIKKWSRWLALDFKRRKARSGSSYS---SVLTTVTHSTSSQSQ : 464  
TruPTR1 : YTEVSGIPWVQVHYEMLVKPLQGFVVAIYCFNGEVQAEIKKWSRWLALDFKRRKARSGSSYS---YGPVMSHTSVINVTARAPL : 461  
TruPTR2 : HTFEG-LSWEVRYMHCLEFFNSFQGFVVAIYCFNGEVQAEIKKWSRWLALDFKRRKARSGSSYS---SVVVGINNNSTSSQ : 478  
TruPTR3 : YTEVTGLLWQVQMHYEMFFNSFQGFVVAIYCFNGEVQAEIKKWSRWLALDFKRRKARSGSSYS---YGPVMSHTSVINVTARAPL : 456  
CinS372 : DDISSGTWWDIRMSFDLFFNSFQGFVVAIYCFNGEVQAEFRKAWERFNLVSEIKRRRERS-----RSSVTMLTSFNSSASQ : 437  
CinS752 : DDISSGTWWDIRMSFDLFFNSFQGFVVAIYCFNGEVQAEFRKAWERFNLVSEIKRRRERS-----RSSVTMLTSFNSSASQ : 458

HsaPTR1 : GLPLSPR-----LLPTATTNGHPQLPGHAKGPTPALETLETPPAMAAPKDDGFLNGSCSGLDEEASGPERPPALLQEEWETV : 592  
HsaPTR2 : ----VAASTRMVLISGKAAKIASRQPDSHITLPGYVWSNSEQDCLPHSFHEETKEDSGRQDDILMEKPSRPMESNPDTEGCQGETEDVL : 550  
TruPTR1 : ALHLTTR-----LGPVPVN-GHRNLPYVKNVSVNSVSSGQELHVPDEE-----HPAPARPCEDQKPSVVEEERETV : 531  
TruPTR2 : SHLAAGAPANLVSRSVRTTGPMSVSTHILPGYVINSNDP-----SIPEEPEDSGPKMVDDISLKENTPVLSPGATAEDEEETL : 559  
TruPTR3 : PRSLVGGVVGSGGSGGLRPPRHNSLYPQSSLSSTYVAADLETPQTQQLLQRESESFKRHVRSKAGPHSRPEASPVQSLREES : 546  
CinS372 : QVRIMTS----- : 444  
CinS752 : QVRIMTS----- : 465

HsaPTR1 : M----- : 593  
HsaPTR2 : ----- : -  
TruPTR1 : M----- : 532  
TruPTR2 : ----- : -  
TruPTR3 : GNILSLKELETVL : 559  
CinS372 : ----- : -  
CinS752 : ----- : -
