# Supplementary material for: Evolution of secretin family GPCR members in the metazoa
Source: PubMed Central journal article supplement (PMC1764030; doi:10.1186/1471-2148-6-108), 2006-12-13
Supplement: 1471-2148-6-108-S6.pdf [file 1471-2148-6-108-S6.pdf]

HsaGCGR : -----MPPCQQRPLLLLLLLACQPQVPSAQMDFLFKWKLFQDQCHHNS-- : 48  
HsaGLP1R: -----MAGAPGLRLALLLLGMVGRAGPRPQAGATVSLWETVQKWRERLRQRCQSRSLTE-- : 52  
HsaGLP2R: MKLGSSRAGPGRGSAGLLPGVHELPMGIPAPWGTSPLSFHRKCSLWAPGRPFLTLVLLVSIKQVTGSLLEETTRKWAQKQOACLRLDLL-- : 88  
HsaG1PR : -----MTTSPILQLLLRLLSCGLLLQRAETGSKGQTAGELYQRYWRERLRRECOETLA-- : 51  
S000537 : -----MHYGDYVLKTVTVRLQFS-----SANSLELVKEQWSSYKNCQLDYLS-- : 42  
S006614 : -----QVKKDDCIQMIMNE : 13  
S007267 : ----- : -  
CinS5B : -----MCKYMKYKEQCEKSLNET : 18  
CinS5A : -----MCKYMKYRERCEKSLNET : 18  
CinS70 : ----- : -

HsaGCGR : LLPPPTELVCNRTEDRYACWEDTPANTANISCPWLPWHHK---VQHRFVVKRCGPDGQWVRGP-RGQPWRDASQCQMDG--EEIEVQK : 132  
HsaGLP1R: DPPPATDLFCNRTEDRYACWEDGEPGFVNVVSCPWLPWASS---VPOGHVVFCTAEGLWLOKDNSSLPWRDLSECEESK----RGRS : 135  
HsaGLP2R: ---KEPSGIFCNGETDQYVWCWPHSSPG+NVSVPSPWLPWSE---ESSGRAYRHCCLAQGTWOTIENATDIWQDDSECSNH---SFKQNV : 169  
HsaG1PR : AAEPSPGLACNGSFDHYVCWDYAAPNATARASCPWLPWHHH---VAAGFVLRCCGSDGQW---LWRDHTQCPN---EKNEAFL : 128  
S000537 : SAEPSTGLVCNRTEDRYACWEDGEPGFVNVVSCPWLPWYRK----- : A : 85  
S006614 : PLSPGGGLFCNRTEDRYACWEDAPASLVNISCPLWLPWYK---VSQGVVPRCGSDGLWERDD-SGHVWRDKSQCEEEECHGLSLQL : 99  
S007267 : -----GIYCKGTFDMFVWCWPHSAPG+NVSVPSPWLPWYSE---DGSRRARHRECLENGTWRERENSSEPRDDSECKEEH---YFKDKE : 77  
CinS5B : LKNFENQTFPCGFEFDRIQICWPHTPAGQLSTTEPCSYIEWR---NESLVAYRFECEFDGSMVVRNDTGQSVQVWNRIQCDVATNGLQYEL : 103  
CinS5A : LKNFENQTFPCGFEFDRIQICWPHTPAGQLLSTTEPCSYIEWRNVVHQLQESLVAYRFECEFDGSMVVRNDTGQSVH-LDHLRGDHRTKMYVGNV : 107  
CinS70 : -----LQYVTVGHALSLATLVALALACLKNIHCTRIVTHMNLMAAFMERGLTWLHSAAPRSEQDLMVEILNLLVTLQN---- : 39

TM1

TM2

HsaGCGR : EVAKMYSSFOVMYTVGYSLSLGLALLLALAILGGLSKLHCTRNIHANLNFASFVVKASSVVLVLDGLLRYFSQKIGDDLVSVTWLSDGAVA : 222  
HsaGLP1R: SPEEQLLFLYIITYTVGALSFSALVLIASAILLGFRLHLHCTRNIYIHLNLFASFILRLASVFIKDAALKWNY-STAAQQHQWDGLLSYQDSL : 224  
HsaGLP2R: DRYALLSTLQVMYTVGYSLSLISLFLALTLTLLFLRKLHCTRNIYIHMNLNFASFILRLTAVLVKDVVFIYNSYKRPNENGMWSYLS-EMST : 258  
HsaG1PR : DQRLILERLQVMYTVGYSLSLTLTLLALLLISLFRKLHCTRNIYIHNLFSTFMLRAAAILSRDRLLEP-RPGPYLG-QDALALWN--QALA : 214  
S000537 : HYGLILGQLRIMYTVGYSLSLGLALLLALGILLAFRKLHCMRNIIHMNLNFASFILRAVSILVKDAFLTTLTLDSSNNNTQAQAPVNTTGIT : 175  
S006614 : WFKQMMVNFVMYTVGYSLSLTLTALVILLSFRKLRCRNIYIHANLFLSLILRAVSVI IKDTMLERHWGREIV-----KQTDAAI : 181  
S007267 : DEMHLQTALELISIIIGYSLSLFLTVALVLMALRKLHCTRNIYIHMNLVFSFILRAMAVILKEIIFVYKHFNLPKDDPQWKSADSAIVL : 167  
CinS5B : GPLEGGPKHNDIYTAGYIFSLVCMVIALFILMFFKKLHCTRNIYIHMNLMLSFIVRYVAVMVKDKVLEIHYAVGQTNLTQMEMSQYCDVA : 193  
CinS5A : LLLSIIDIVTKIYTAGYIFSLVCMVIALFILMFFKKLHCTRNIYIHMNLMLSFIVRYVAVMVKDKVLEIHYAVGRPNLTQMEMSQYCDVA : 197  
CinS70 : DYNARYEILTRVYTVGHALSLATLVALALACLKNIHCTRIVTHMNLMAAFMERGLTWLHSAAPRSEQDLMVEILNLLVTLQN---- : 124

TM3

TM4

HsaGCGR : G-----CRVAAVFMQYGI VANYCWLLEVEGLYLHNLGLATLPERSEFFSLYLGIGWGAPMLFVVPVAVVKCLF--ENVQCWTSNDNMGF : 303  
HsaGLP1R: S-----CRLVFLMLQYCVAAANYWLLVEGVYLYTLLEAFVSEQWIFRLVYSIGWVPLFLVVPVWGVKYLK--EDEGCWTRNSNMNY : 305  
HsaGLP2R: S-----CRSVQVLLHYFVGANYLWLLVEGLYLHTLLEPTVLPERRLWPRYLLLGWAFVPLFVVPVWGFARAH--ENTGCWTTNGNKKI : 339  
HsaG1PR : A-----CRTAQIVTQYCVGANYTWLLVEGVYLSLVLVGGSEEGHFRYYLLLGWAGAPALFVIPWVIVRYLY--ENTQCWERNEVKAI : 295  
S000537 : W-----CRGAMVMQYQVMANNYWLLVEGILYLSLVLVTFSEKKYFYIYMAIGWAPLMFVVPVWPTVVKYLK--ENNEECWERNINMGF : 256  
S006614 : G-----CRMQAQVMQYCVLANHCWFFGEAVLYSVLIASVFI DNKPLPYICLWGTPLFLFVIPVWVVKLLH--ENKECWAFNENMNY : 262  
S007267 : S-----CRVAVCMQYFVACNYFWLLVEAVFLHTLLEFSAVLTKRRLKRYMLLGWGTPLVFPVTPVTVVKLLH--ENTGCWSIMN-KWI : 247  
CinS5B : -----CRLVITLHMHYAI IANYFWLLVEGVYLD-LLLVFVMTEYKYFPIFMAFGWGAPWIPIGIWI AFRI TF--ENVGCWEIYNALRT : 272  
CinS5A : GTDGLMVSCR LVITLHMHYAI IANYFWLLAEGVYLD-LLLVFVMTEYKYFPIFMAFGWGATWIPIGIWI AFRI TF--ENVGCWEVNNMIPI : 284  
CinS70 : -----WCLYLVNFQIYFVTANYFWLLVEGLYLRLLRAVLFVSHTKYMKAFILVGLWGLPWLFPVVA YFVPSKLDPEENRDCWYEDRNSAY : 207

TM5

TM6

HsaGCGR : WWILRFPVFLAILINFFIFVRIQVLLVAKLRA----RQMHTDYKFRFAKSTLTLIPLLGVEHVFAFVTDEHAQ--GTLRSAKLFFDL : 386  
HsaGLP1R: WWIIRLPILFAIGVNFIFVVICIVVSKLKA----NLMCKTDIKRFAKSTLTLIPLLGTHEVIFAFVMDHAR--GTLRFIKLFTLE : 388  
HsaGLP2R: WWIIRGPMMLCVTVNFIFILKILKLLSKLKA----HQMCFRDYKFRFAKSTLTLIPLLGVEHILFSFTLDDQVE--GFAKLIRL IQL : 422  
HsaG1PR : WWIIRTPILMTILINFLIFIRILGILLKLRIT--RQMRCDYRLLRFAKSTLTLIPLLGVEHVFAFVTEEQR--GALRFALGFETE : 378  
S000537 : WWIIRSPILFAYLINFFIFIRIKILMSKLRA----HQMRYTDYKFRFAKSTLTLIPLLGHAILEFTFVIDESVQKGSLLRLIRLFYDL : 341  
S006614 : WWIIRLPILFASLINFILFMKILKVLKLRAN----KQSGYDYKLRFAKATLTLIPLFGIHEIIFIFATDEQTT--GILRYIKVFFTL : 346  
S007267 : WWIIRGPITLTFVINFCIFIKILMLLSKLKA----DQLKF TDYRFLAKAKLVLIPLLGIEHVFMVLTDECME--GRSLYAKNFVNL : 330  
CinS5B : WWILSAPILISIAINFIFINIIRMIVSKLRA----NNMTRSDYKFRFAKSTLAL IPLLGHIHYIFFMGVS DSVTN--STIKTKFAFEL : 355  
CinS5A : WWILRAPILISIAINFIFINIIRMIVSKLSA----NNMTRSDYKFRFAKSTLAL IPLLGHIHYIVFMGVS DSVTDN-SAFINTKFAFEL : 368  
CinS70 : WWIVKVPILISLLINFIFVNVVVCVGAKLRRVNQRQADDRREDYKWRFAKSTLTLIPLLGTOYLI TAFVHFDSEEN-PTAEFVKKAFEL : 296

TM7

HsaGCGR : FLSSFQGLLVAVLYCFLNKEVQSELRRRWRHRLGKVLWEERNTSN----- : 432  
HsaGLP1R: SFTSFQGLMVAI LYCFVNVNEVQLFRKSWERWRLEHLHIQRDSSMK----- : 434  
HsaGLP2R: TLSSFHGFLVALQYGFANGEVKAELRKYWVFRLLARHSGCRACVLGKDFRFLGKCP--KKLSEGDGAEKRLKQLPSLNSGRLLHLAMRG- : 509  
HsaG1PR : FLSSFQGFVSVLYCFINKEVQSEIRRGWVHCRLLRRLSLGEEQRQLP----- : 424  
S000537 : FLSSFQ----- : 347  
S006614 : TLNSFQGLLVSVLYCYANKEVTRTELRRKWHIWRTEAEFV----- : 385  
S007267 : TLNSFQGFVAVLYCFANGEVQAELEKRWQLFLFNHNFQVRGCFQKPLKQLWKCTQGRRPQCSRQSDSCDEGEASTHPQLQVAVHRG : 420  
CinS5B : ILTSLQGSIIA ILYCFLNGEVQTEIRKCRNWRWSHRLPAASGKFSTYRSVQMTSITYAHSIDKGD----- : 422  
CinS5A : ILTSLQGSIIA ILYCFLNGEVQTEIRKCRNWRWSHRLPAASGKFSTYRSVQMTSITYAHSMDKGD----- : 435  
CinS70 : FLVSIQGLLVAVFIYCFNNGEVQEECGKTWRKWRWELERRERKHHR----- : 343

HsaGCGR : -----HRASSSPGHGPPSKELQFGRGGGSQDSSAETPLAGG-LPRLAESPF----- : 477  
HsaGLP1R: -----PLKCP TSSLSGATAGSSMYTATCQASCS----- : 463  
HsaGLP2R: -----LGELGAQPQ--DHARWPRGSSLSSECS-EGDVTMANTMEEIIEESEI----- : 553  
HsaG1PR : -----ERAFRALPSGSGPGEVPTSRG-----LSSGTLPGPGNEASRELESYC----- : 466  
S000537 : ----- : -  
S006614 : ----- : -  
S007267 : GRAVGVRGEVKGQSGGGCDSAGLDLLTRKSLSSSDGELTLGELTMEIIEESEF----- : 473  
CinS5B : -----AHETSLSPNNKHDHVDNKRSS TASCVSDDQTKIGDSSRLMCNGNGSPSKQLVV----- : 476  
CinS5A : -----AHETSLSPNNKHDHVDNKRSS TASCVSDDQTKIGDSSRLMCNGNGSPSKQLVV----- : 489  
CinS70 : -----MQRRRSMNHSSITNLF TSVVTRKSSLYTGES----- : 374
